# Supplementary material
Source: PubMed Central journal article supplement (PMC7093231)
Supplement: NIHMS1569349-supplement-1.pdf [file NIHMS1569349-supplement-1.pdf]

## **Supplemental Information**

### **Genome-wide Screening Identifies SFMBT1 as an Oncogenic Driver in Cancer with VHL Loss**

Xijuan Liu, Jeremy M. Simon, Haibiao Xie, Lianxin Hu, Jun Wang, Giada Zurlo, Cheng Fan, Travis S. Ptacek, Laura Herring, Xianming Tan, Mingjie Li, Albert S. Baldwin, William Y. Kim, Tao Wu, Marc W. Kirschner, Kan Gong, and Qing Zhang

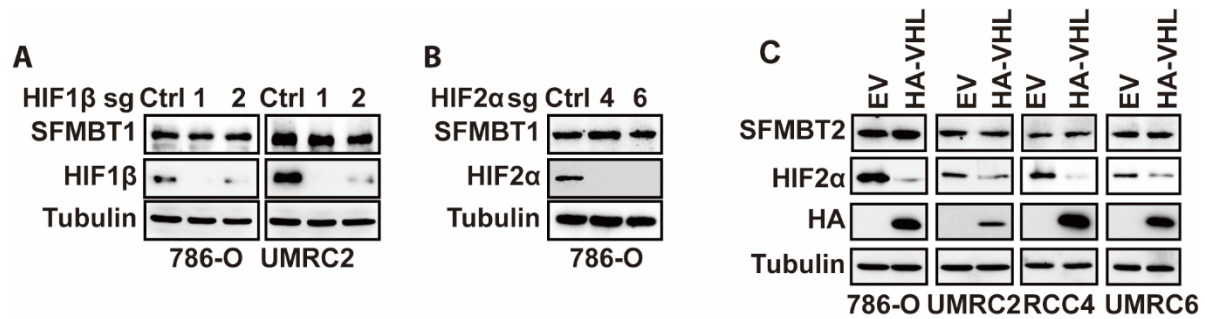

**Figure S1. The regulation of SFMBT1 by pVHL was independent of HIF signaling, and SFMBT2 was not regulated by pVHL, related to Figure 1.**

(A) Immunoblots for lysates from 786-O and UMRC2 cells transduced with lentivirus expressing control sgRNA (Ctrl) or HIF1β sgRNAs (1 and 2).

(B) Immunoblots for lysates from 786-O transduced with lentivirus expressing control sgRNA (Ctrl) or HIF2α sgRNAs (4 and 6).

(C) Immunoblots for lysates from cells transduced (786-O, UMRC2 and RCC4) with lentivirus expressing control (Ctrl) or HA-pVHL and cells transfected (UMRC6) with control vector (Ctrl) or HA-pVHL.

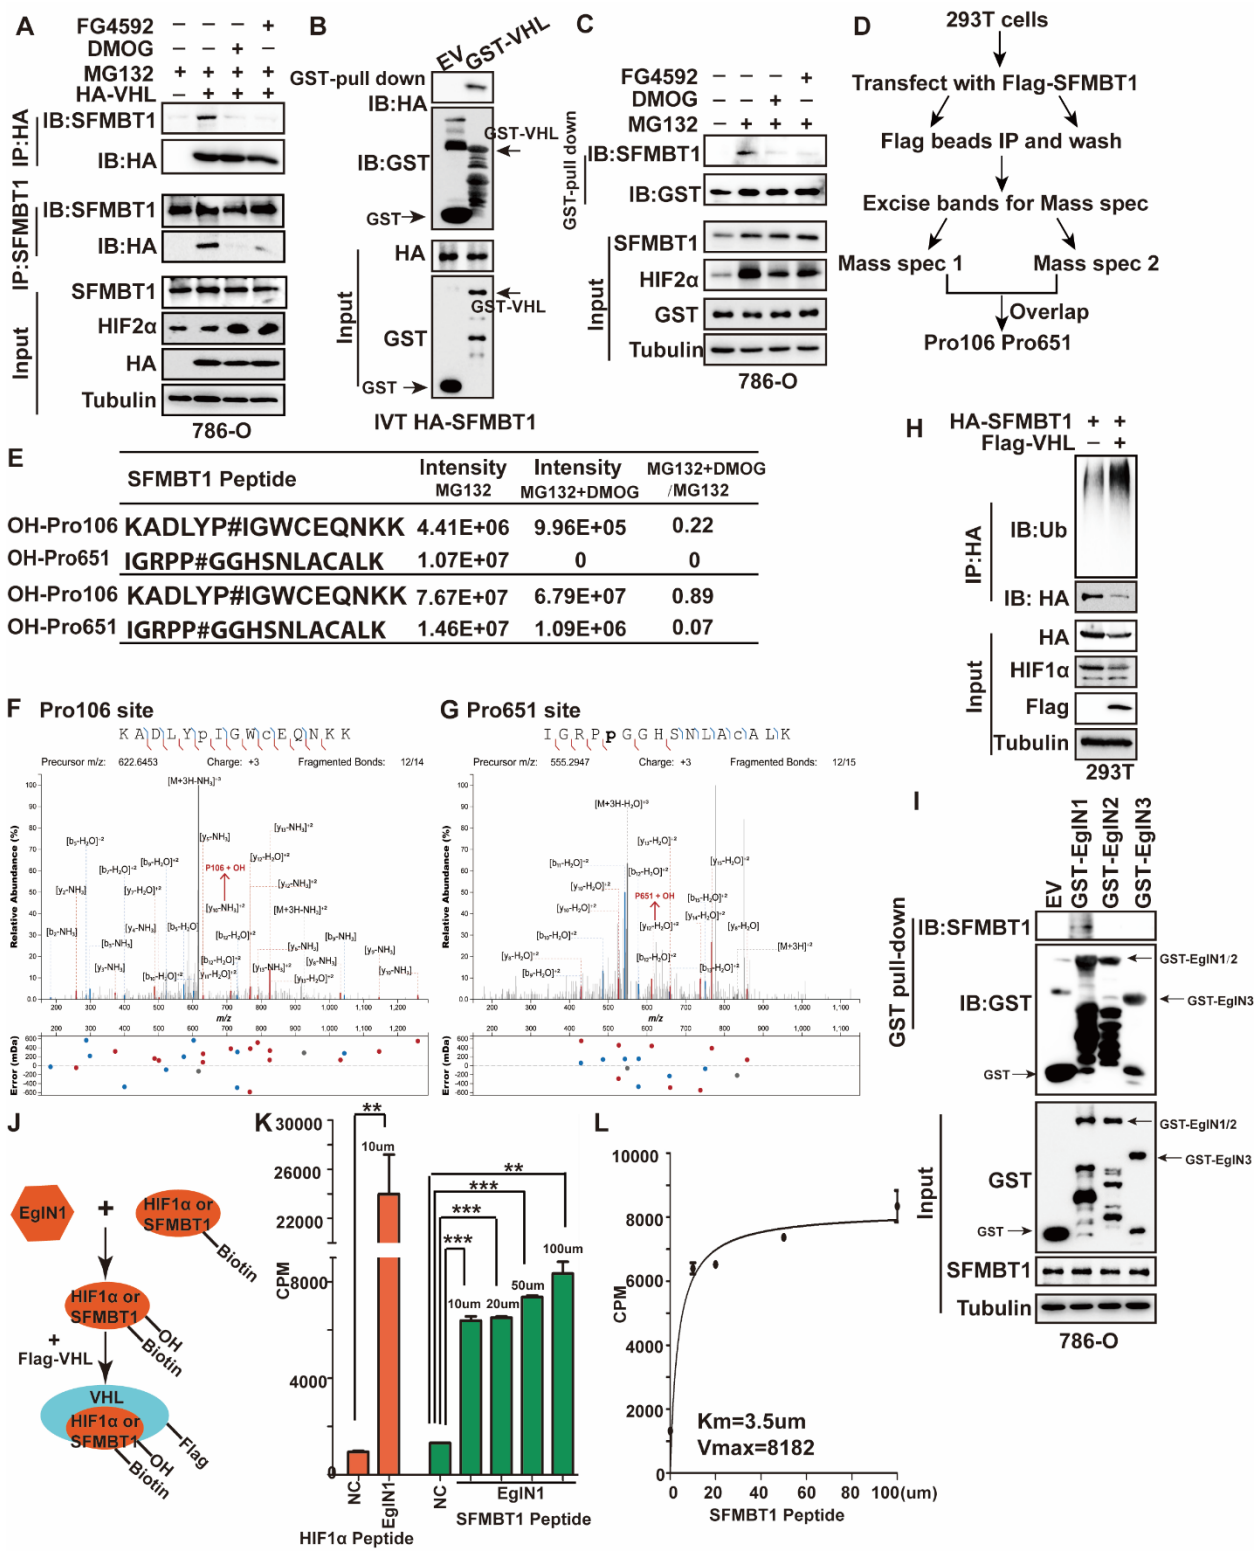

**Figure S2. SFMBT1 stability is regulated by pVHL through EglN1 hydroxylation, related to Figure 2.**

(A) Immunoprecipitation and immunoblots from 786-O cells transduced with lentivirus expressing either control vector (Ctrl) or HA-pVHL.

(B) GST-pull down assay between GST (EV) or GST-pVHL and IVT SFMBT1. Bands of GST-pVHL are indicated by arrows.

(C) GST-pull down assay between GST-pVHL and endogenous SFMBT1 from 786-O cells with indicated drugs treatment.

(D) Schematic diagram of SFMBT1 prolyl hydroxylation identification strategy by mass spectrometry.

(E) Intensity values of two potential prolyl hydroxylation sites (Pro106 and Pro651) identified in two independent mass spectrometry assays.

(F-G) MS/MS spectrum for identified hydroxylated SFMBT1 peptides at Pro106 (F) and Pro651 (G).

(H) Effect of Flag-pVHL on ubiquitination of transfected HA-SFMBT1 in 293T cells.

(I) GST-pull down assay between GST (EV) or GST-EglNs (EglN1, EglN2 and EglN3) and endogenous SFMBT1 in 786-O cell lysate. Bands of GST-EglNs are indicated by arrows.

(J) Schematic diagram of capture of biotinylated peptides by Flag-VHL after in vitro hydroxylation.

(K) CPM value with HIF1 $\alpha$  and SFMBT1 peptide at the indicated concentration with the in vitro hydroxylation assay. NC denotes for negative control (With 10  $\mu$ m HIF1 $\alpha$  peptide or 100  $\mu$ m SFMBT1 peptide but without the EglN1). \*\*, P<0.01; \*\*\*, P<0.001.

(L) Km and Vmax of SFMBT1 peptide.

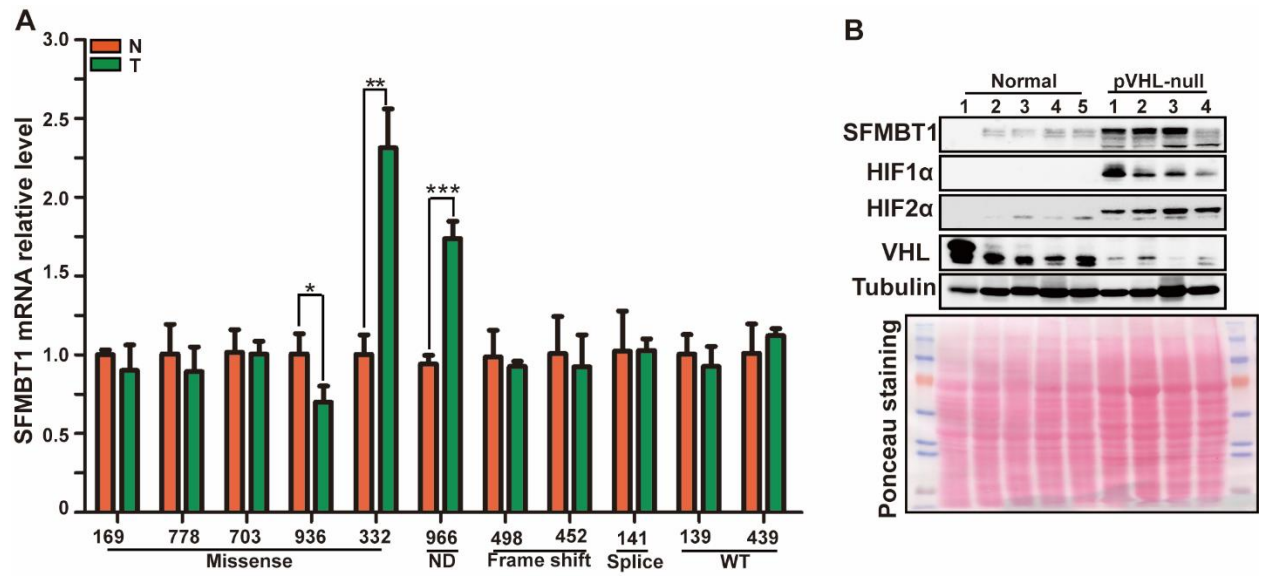

**Figure S3. Related to Figure 3.**

(A) Relative SFMBT1 mRNA level in indicated ccRCC paired patient normal (N) and tumor (T) tissues. \*,  $P < 0.05$ ; \*\*,  $P < 0.01$ ; \*\*\*,  $P < 0.001$ .

(B) SFMBT1 expression level is upregulated in pVHL-null-induced renal cancer using a novel ccRCC mouse model (Bailey et al., 2017).

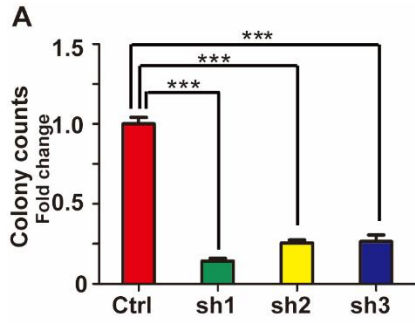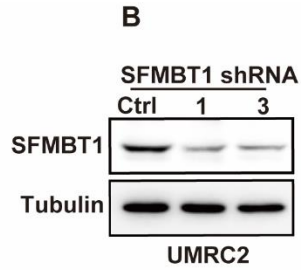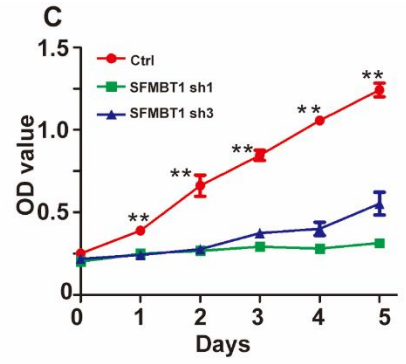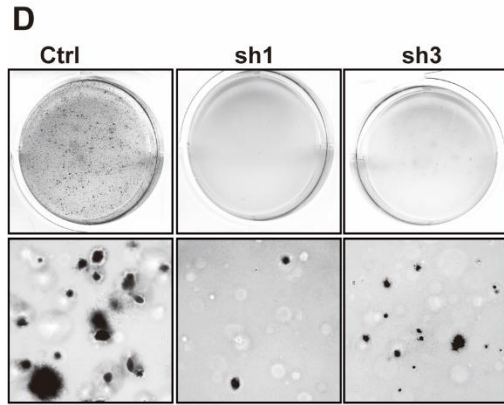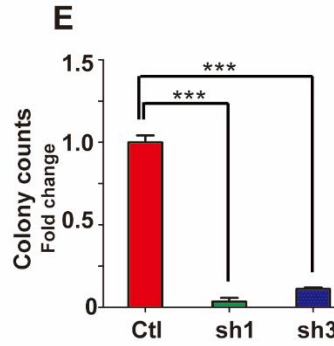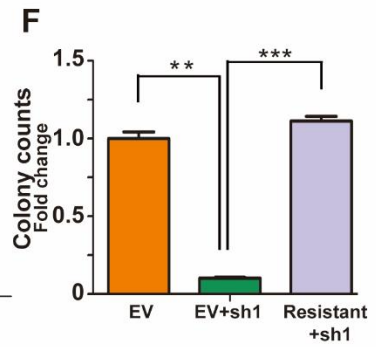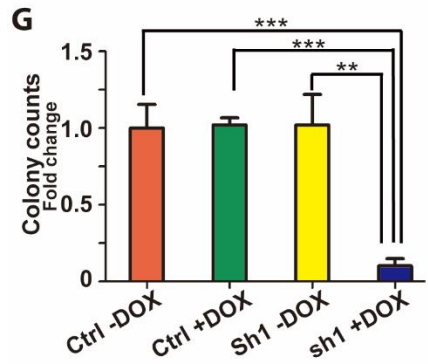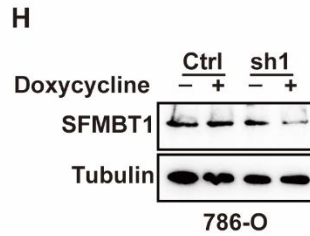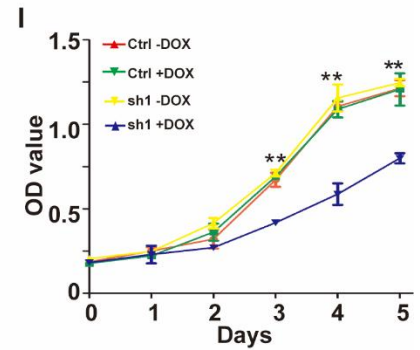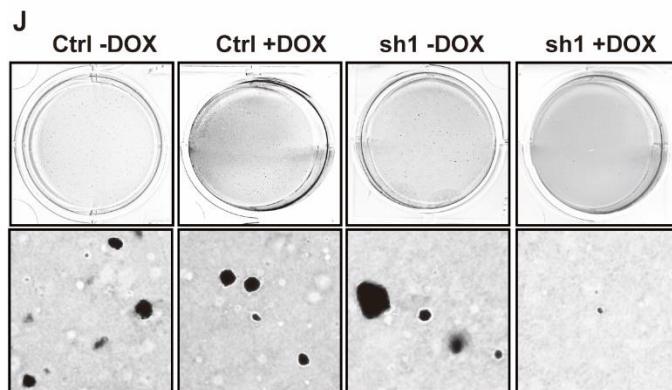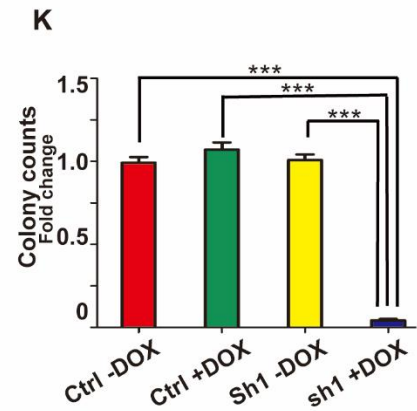

**Figure S4. SFMBT1 regulates ccRCC cell proliferation, anchorage-independent growth, related to Figure 4.**

(A) Quantification of soft agar assays of 786-O transduced with lentivirus expressing either control shRNA (Ctrl) or SFMBT1 shRNAs (sh1, sh2 and sh3).

(B-E) Immunoblots for lysates (B), cell proliferation assays (C), representative anchorage-independent growth assays (D) and quantification of soft agar assays(E) of UMRC2 cells transduced with lentivirus expressing either control shRNA (Ctrl) or SFMBT1 shRNAs (sh1 and sh3). \* SFMBT1 sh1/sh3 vs Ctrl; \*\*,  $P < 0.01$ ; \*\*\*,  $P < 0.001$ .

(F) Quantification of soft agar assays of UMRC2 cells transduced with lentivirus expressing either control shRNA (Ctrl) or SFMBT1 sh1, followed by infection with lentivirus encoding empty vector (EV) or HA-SFMBT1 sh1-resistant (resistant). \*\*,  $P < 0.01$ ; \*\*\*,  $P < 0.001$ .

(G) Quantification of soft agar assays of UMRC2 luciferase stable cells infected with lentivirus encoding either Teton control shRNA (Ctrl) or Teton-SFMBT1 shRNA1 (sh1) and treated with or without doxycycline as indicated. \*\*,  $P < 0.01$ ; \*\*\*,  $P < 0.001$ .

(H-K) Immunoblots for lysates (H), cell proliferation assays (I), representative anchorage-independent growth assays (J) and quantification of soft agar assays(K) of 786-O luciferase stable cells infected with lentivirus encoding either Teton control shRNA (Ctrl) or Teton-SFMBT1 sh1 and treated with or without doxycycline as indicated. \* sh1+DOX vs Ctrl-DOX/Ctrl+DOX/sh1-DOX; \*\*,  $P < 0.01$ ; \*\*\*,  $P < 0.001$ .

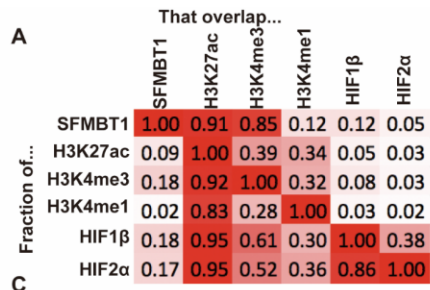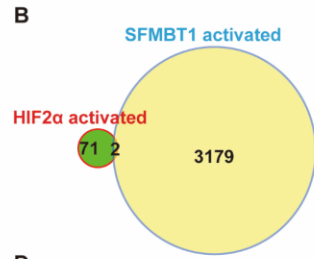

**C**

| Motif | TF family            | %target | %bkg | -log <sub>10</sub> p-value |
|-------|----------------------|---------|------|----------------------------|
|       | RBPJ1                | 80      | 52   | 204                        |
|       | PCBP1                | 81      | 56   | 170                        |
|       | MYC                  | 84      | 60   | 170                        |
|       | AP-1                 | 78      | 56   | 130                        |
|       | ELF/ETS              | 78      | 56   | 128                        |
|       | SP3/C2H2 Zinc Finger | 88      | 70   | 112                        |
|       | FOXD3                | 76      | 59   | 84                         |

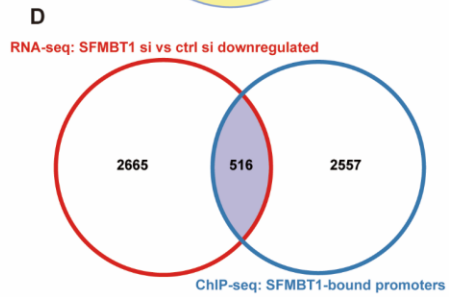

**E**

| Gene     | SFMBT1 si vs Ctrl | LogFC value          | Peaks in promoter | Tumor vs Normal | Kaplan-Meier survival | H3k4me3 promoter | H3k27ac promoter |
|----------|-------------------|----------------------|-------------------|-----------------|-----------------------|------------------|------------------|
| MAP1LC3C | Down              | -3.56259139315287    | Yes               | Higher          | poorer                | Yes              | Yes              |
| RRAD     | Down              | -2.06101492274293    | Yes               | Higher          | poorer                | Yes              | Yes              |
| SEMA3A   | Down              | -1.87089177390015    | Yes               | Higher          | poorer                | Yes              | Yes              |
| EPHA6    | Down              | -1.5040555460055     | Yes               | Higher          | poorer                | Yes              | Yes              |
| MC1R     | Down              | -1.23947079355145    | Yes               | Higher          | poorer                | Yes              | Yes              |
| TGFβ3    | Down              | -1.0033773028615     | Yes               | Higher          | poorer                | Yes              | Yes              |
| SLC7A11  | Down              | -0.756284348422694   | Yes               | Higher          | poorer                | Yes              | Yes              |
| RUNX2    | Down              | -0.714506166091121   | Yes               | Higher          | poorer                | Yes              | Yes              |
| ARHGAP4  | Down              | -0.644301350731426   | Yes               | Higher          | poorer                | Yes              | Yes              |
| TNEM132A | Down              | -0.638949315496535   | Yes               | Higher          | poorer                | Yes              | Yes              |
| ABCC3    | Down              | -0.590134032687698   | Yes               | Higher          | poorer                | Yes              | Yes              |
| TP53INP1 | Down              | -0.554533421067639   | Yes               | Higher          | poorer                | Yes              | Yes              |
| DUSP10   | Down              | -0.46350276207918    | Yes               | Higher          | poorer                | Yes              | Yes              |
| BBC3     | Down              | -0.450409773053357   | Yes               | Higher          | poorer                | Yes              | Yes              |
| CCDC57   | Down              | -0.43855089932111759 | Yes               | Higher          | poorer                | Yes              | Yes              |
| FGD6     | Down              | -0.428008513482787   | Yes               | Higher          | poorer                | Yes              | Yes              |
| SPHK1    | Down              | -0.39868831680562    | Yes               | Higher          | poorer                | Yes              | Yes              |
| TET3     | Down              | -0.37373489661307    | Yes               | Higher          | poorer                | Yes              | Yes              |
| CNPY3    | Down              | -0.354376041133043   | Yes               | Higher          | poorer                | Yes              | Yes              |
| SH3BP1   | Down              | -0.228340428319598   | Yes               | Higher          | poorer                | Yes              | Yes              |

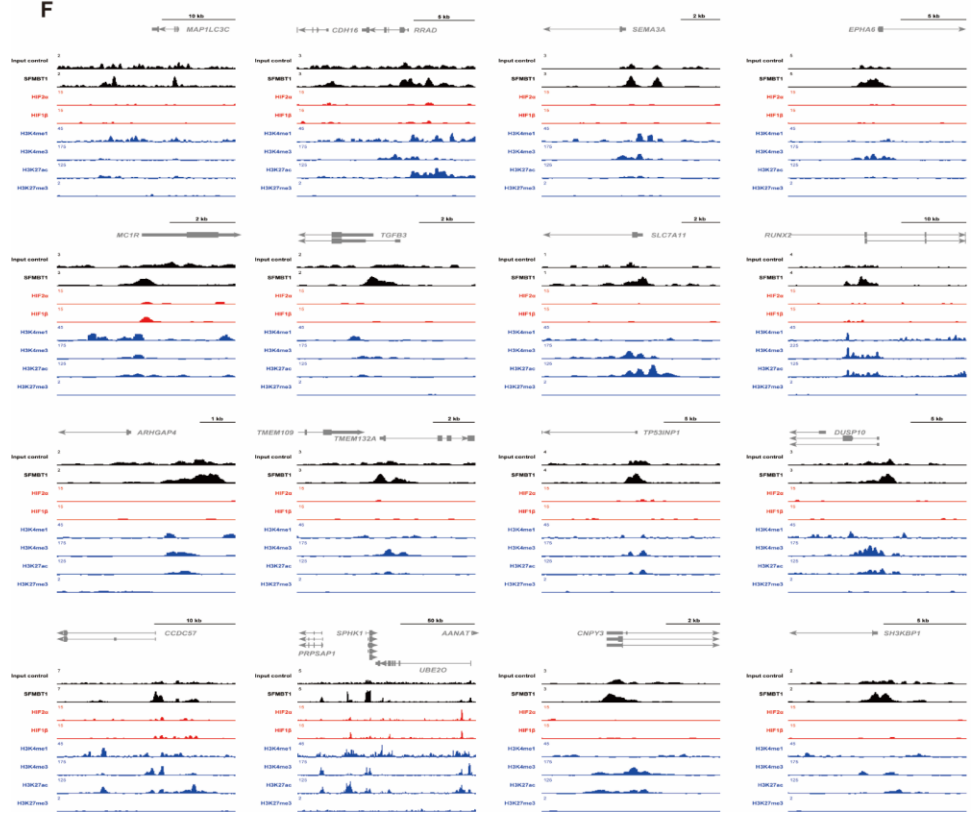



**Figure S5. Identification of critical SFMBT1 direct target genes in ccRCC, related to Figure 5 and Figure 6.**

(A) Chip-Seq binding sites overlap for indicated transcription factors SFMBT1, HIF2 $\alpha$ , and HIF1 $\beta$ , as well as H3K4me1, H3K4me3, H3K27ac and H3K27me3.

(B) Overlap between SFMBT1 and HIF2 activated genes derived from RNA-seqs. HIF2 $\alpha$  activated target genes in 786-O were analyzed from HIF2 $\alpha$  siRNA RNA-seq data available online (GSE102097) (Yao et al., 2017).

(C) Over-enriched transcription factor motifs for sites unique to SFMBT1. The general family of transcription factors is shown alongside the  $-\log_{10}$  p-value of enrichment compared to nearby background sequence.

(D) Overlap between SFMBT1 binding sites and genes that are positively regulated by SFMBT1 from RNA-seq.

(E) SFMBT1 direct target gene list.

(F) ChIP-Seq binding sites of SFMBT1, HIF2 $\alpha$ , and HIF1 $\beta$ , as well as H3K4me1, H3K4me3, and H3K27Ac for 16 target genes.

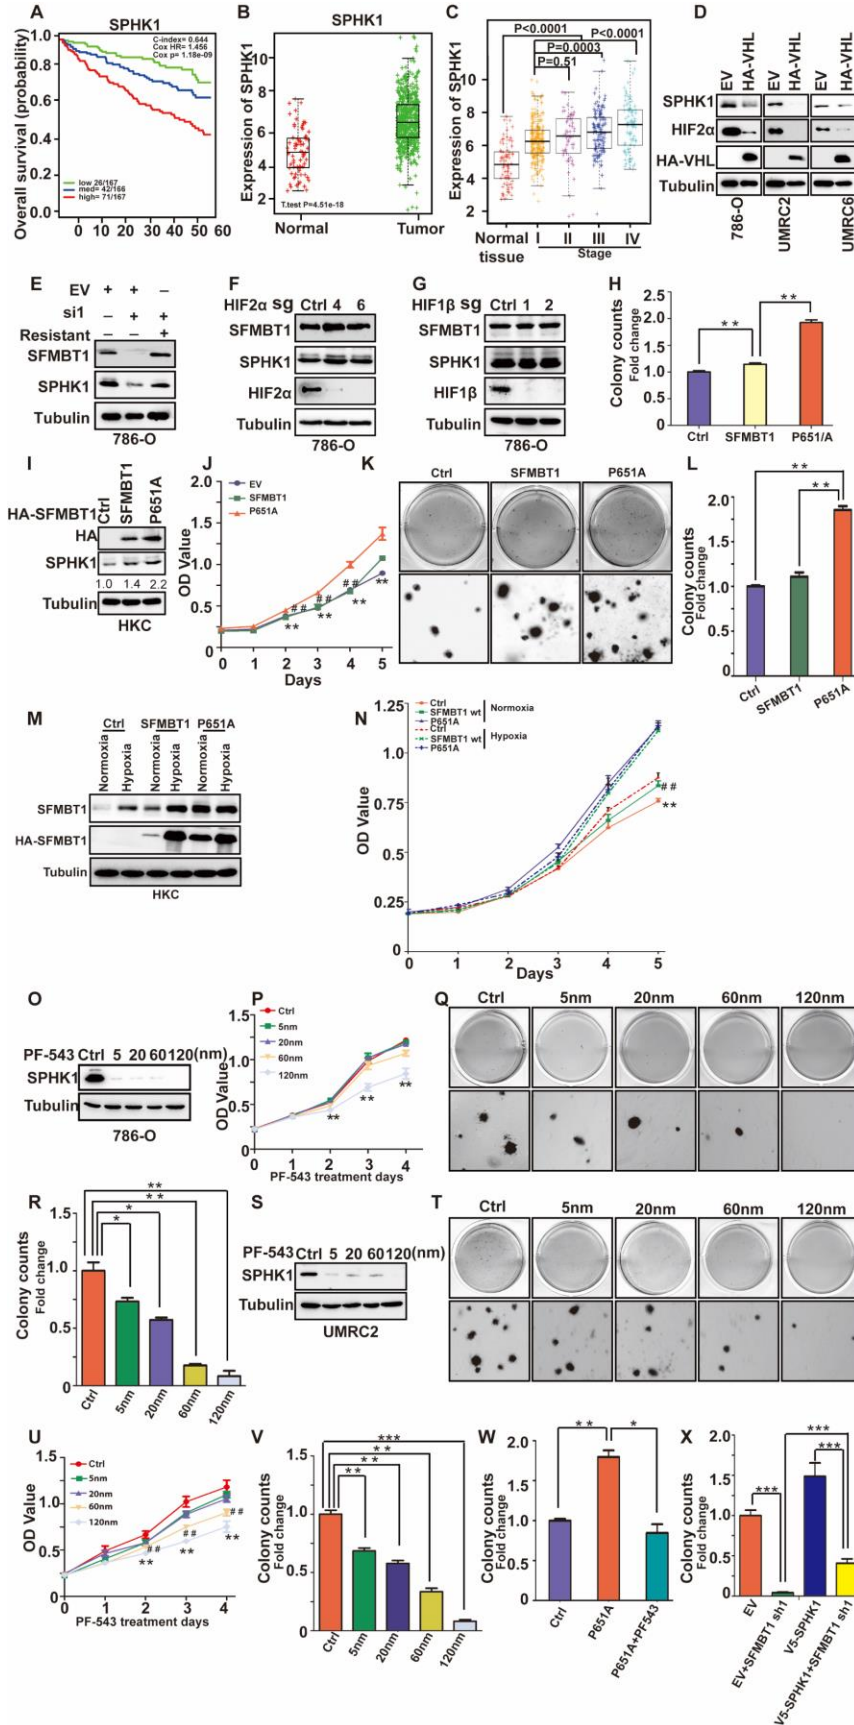

**Figure S6. SPHK1 is an SFMBT1 direct target gene in ccRCC, related to Figure 6.**

- (A) Box plots of SPHK1 expression between normal and ccRCC tumors in TCGA.
- (B) Kaplan–Meier (K-M) plot of SPHK1 in TCGA Kidney Clear Cell Carcinoma (KIRC) data set.
- (C) Box plots of SPHK1 expression between different stages of ccRCC tumors.
- (D) Immunoblots for lysates from cells transduced (786-O and UMRC2) with lentivirus expressing either control (Ctrl) or HA-pVHL and cells transfected (UMRC6) with control vector (Ctrl) or HA-pVHL.
- (E) Immunoblots for lysates from 786-O cells transduced with lentivirus expressing either empty vector (EV) or SFMBT1 si1-resistant, followed by transfection with control siRNA or SFMBT1 si1.
- (F) Immunoblots for lysates from 786-O cells transduced with lentivirus expressing either HIF2 $\alpha$  control sgRNA (Ctrl) or sgRNAs (4 and 6).
- (G) Immunoblots for lysates from 786-O cells transduced with lentivirus expressing either HIF1 $\beta$  control sgRNA (Ctrl) or sgRNAs (1 and 2).
- (H) Quantification of soft agar assays in Flag-VHL-UMRC2 cells transduced with lentivirus expressing either empty vector (EV), HA-SFMBT1 or P651A. \*\*, P<0.01.
- (I-L) Immunoblots for lysates (I), cell proliferation assays (J), representative anchorage-independent growth assays (K) and quantification of soft agar assays (L) in HKC cells transduced with lentivirus expressing either empty vector (EV), HA-SFMBT1 or P651A. \* EV vs P651A; # SFMBT1 vs P651A. \*\*/#, P<0.01.
- (M-N) Immunoblots for lysates (M) and cell proliferation assays (N) in HKC cells infected with lentivirus encoding either empty vector (EV), HA-SFMBT1 (SFMBT1) or P651A mutant under normoxia or hypoxia.\* Hypoxia Ctrl vs Normoxia Ctrl; # Hypoxia SFMBT1 wt vs Normoxia SFMBT1 wt. \*\*/#, P<0.01.
- (O-R) Immunoblots for lysates (O), cell proliferation assays (P), representative anchorage-independent growth assays (Q) and quantification of soft agar assays (R) in 786-O cells treated with indicated concentration of SPHK1 inhibitor PF543. \*120nm vs Ctrl; \*\*, P<0.01.
- (S-V) Immunoblots for lysates (S), cell proliferation assays (T), representative anchorage-independent growth assays (U) and quantification of soft agar assays (V) in UMRC2 cells treated

with indicated concentration of SPHK1 inhibitor PF543. \*120nm vs Ctrl; # 60nm vs Ctrl; \*\*/# #, P<0.01.

(W) Quantification of soft agar assays in Flag-VHL-UMRC2 cells infected with lentivirus encoding either empty vector (EV), P651A or P651A with PF543 treatment. \*, P<0.05; \*\*, P<0.01.

(X) Quantification of soft agar assays in 786-O cells transduced with lentivirus expressing either SFMBT1 shRNA control (Ctrl) or SFMBT1 sh1, followed by infection with lentivirus encoding either empty vector (EV) or v5-SPHK1. \*\*\*, P<0.001

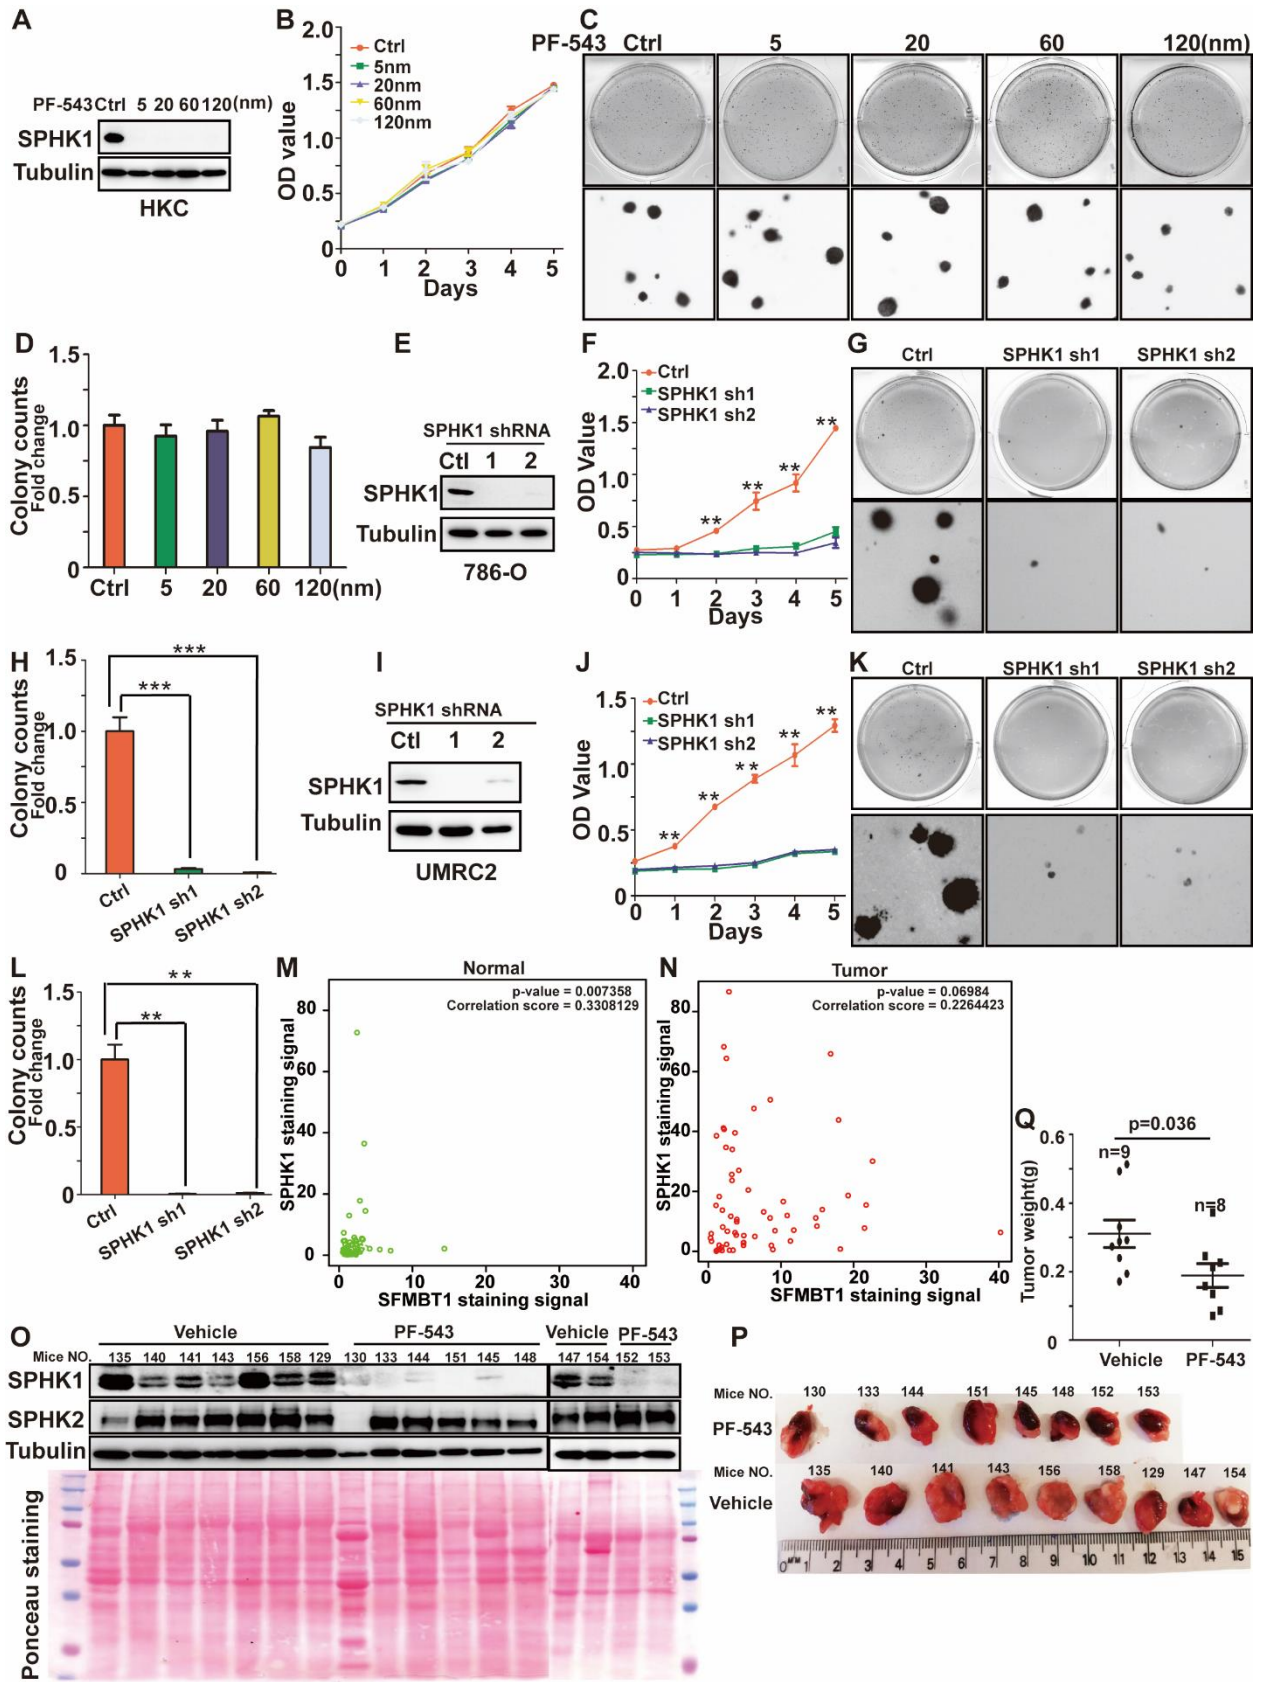

**Figure S7. SPHK1 regulates ccRCC cell proliferation, anchorage-independent growth and tumorigenesis, related to Figure 7.**

(A-D) Immunoblots for lysates (A), cell proliferation assays (B), representative anchorage-independent growth assays (C) and quantification of soft agar assays (D) in HKC cells treated with indicated concentration of SPHK1 inhibitor PF543.

(E-H) Immunoblots for lysates (E), cell proliferation assays (F), representative anchorage-independent growth assays (G) and quantification of soft agar assays (H) in 786-O cells transduced with lentivirus expressing either control shRNA (Ctrl) or SPHK1 shRNAs (sh1 and sh2). \* SPHK1 sh1/sh2 vs Ctrl.

(I-L) Immunoblots for lysates (I), cell proliferation assays (J), representative anchorage-independent growth assays (K) and quantification of soft agar assays (L) in UMRC2 cells transduced with lentivirus expressing either control shRNA (Ctrl) or SPHK1 shRNAs (sh1 and sh2). \* SPHK1 sh1/sh2 vs Ctrl.

(M-N) Correlation analysis between SFMBT1 and SPHK1 expression level in non-tumor (N) (E) and tumor (T) (F) tissues.

(O) Immunoblots of lysates from gross tumors at necropsy of mice injected with 786-O cells treated with Vehicle or PF-543 for SPHK1/2.

(P) Gross tumors (including kidney and tumor tissue) at necropsy of mice injected with 786-O cells treated with Vehicle or PF-543.

(Q) Plot of gross tumor weights at necropsy of mice injected with 786-O cells treated with Vehicle or PF-543.

**TABLE S1. SHRNA SEQUENCES, REAL-TIME PCR PRIMER SEQUENCES, CHIP-QPCR PRIMERS, related to STAR Methods section.**

| Oligonucleotides                                                                                  |            |     |
|---------------------------------------------------------------------------------------------------|------------|-----|
| Control shRNA:<br>AACAGTCGCGTTTGC GACTGG                                                          | This paper | N/A |
| SFMBT1 shRNA1:<br>GCTACTGTTGAGATAGTGAAA                                                           | This paper | N/A |
| SFMBT1 shRNA2:<br>CCTTCAGCCATTAGACATCTA                                                           | This paper | N/A |
| SFMBT1 shRNA3:<br>GAAGCCTATACCTGAATGTAT                                                           | This paper | N/A |
| SFMBT1 siRNA1:<br>TGGCAGACGTTGTGCGGTT                                                             | This paper | N/A |
| SFMBT1 siRNA2:<br>GGAAAGAGTTATCGGGCTA                                                             | This paper | N/A |
| SPHK1 shRNA1:<br>GCAGCTTCCTTGAACCATTAT                                                            | This paper | N/A |
| SPHK1 shRNA2:<br>GCAGGCATATGGAGTATGAAT                                                            | This paper | N/A |
| Real-Time PCR Primer:<br>B-Actin<br>F: AGAAAATCTGGCACCACACC<br>R:GGGGTGTGGAAGGTCTCAA              | This paper | N/A |
| Real-Time PCR Primer:<br>SFMBT1<br>F: ACG GAT GTG GGG AAG TCC TA<br>R: GGC AGA ATT CAG TCA CCC GA | This paper | N/A |
| Real-Time PCR Primer:<br>TGFB3<br>F:ACTTGGAGGAGAACTGCTGTG<br>R: GCAGATGCTTCAGGGTTCAG              | This paper | N/A |
| Real-Time PCR Primer:<br>MCIR<br>F: CTTAAAGGCGCTGTCACCCT<br>R: GCATTGCAGATGATGAGGGC               | This paper | N/A |
| Real-Time PCR Primer:<br>MAPLC3C<br>F: GCTGGTGAACAACAAGAGCC<br>R: TCCAGGCAGCCAAATGTCTC            | This paper | N/A |
| Real-Time PCR Primer:<br>RRAD1<br>F: CTGTTTGAAGGTGTCGTGCG<br>R: GCCTTTTTGCCAAGGCTCTC              | This paper | N/A |
| Real-Time PCR Primer:<br>SEMA3A<br>F: GCAATTACCTCTGCCATGCG<br>R: ACCAGACCTTCTGGCTAGGT             | This paper | N/A |
| Real-Time PCR Primer:<br>EPHA6<br>F: CTATGAGAAAGAACATGAGCAGC<br>R: CGCAGTTCTCACTCGGATGT           | This paper | N/A |

|                                                                                          |            |     |
|------------------------------------------------------------------------------------------|------------|-----|
| Real-Time PCR Primer:<br>SLC7A11<br>F: TCCATGAACGGTGGTGTGTT<br>R: TGGTAGAGGAGTGTGCTTGC   | This paper | N/A |
| Real-Time PCR Primer:<br>RUNX2<br>F: TCTGGCCTTCCACTCTCAGTA<br>R: GGACATGCCTGAGGTGACTG    | This paper | N/A |
| Real-Time PCR Primer:<br>TMEM132A<br>F: AGTCTGCCAACACACAGGTC<br>R: GGTGTGCGGTGAGCTCGATAC | This paper | N/A |
| Real-Time PCR Primer:<br>TP53IN1<br>F: AGTCCCAGAGTGGAAAGCTCA<br>R: TGGCGACGAAGGCTATTTCT  | This paper | N/A |
| Real-Time PCR Primer:<br>DUSP10<br>F: ATGAGCCAAGCCGAGTGATG<br>R: TCTTGGAGCTGGAGGGAGTT    | This paper | N/A |
| Real-Time PCR Primer:<br>CCDC57<br>F: CTTGAGGAGCTCGACGGTGA<br>R: TGCTCCCTCTCCGCATTTT     | This paper | N/A |
| Real-Time PCR Primer:<br>CNPY3<br>F: GAGGAGAACGACTGGGTTTCG<br>R: CTGACTTCAGCTCCACAGCA    | This paper | N/A |
| Real-Time PCR Primer:<br>SH3KBP1<br>F: GACGATCAGCGTGGGTGAAA<br>R: CAGGGGCTTTTCTGGAGCTT   | This paper | N/A |
| Real-Time PCR Primer:<br>SPHK1<br>F: CCGGTAGATGCACACCTTGT<br>R: TGGGTGCAGCAAACATCTCA     | This paper | N/A |
| Real-Time PCR Primer:<br>ARHGAP4<br>F: CAAGCTGGGTTTCTCGTGC<br>R: AGCAGTCCATGAGGTCCAAG    | This paper | N/A |
| ChIP-qPCR primers:<br>TGFB3<br>F: TTTGCGAGTCCTCTCGTTTCG<br>R: AACGTGTGGCAGGAGTGATT       | This paper | N/A |
| ChIP-qPCR primers:<br>MCIR<br>F: ATGGAGGTGGCTTGTGAGTG<br>R: ACCGCATCAGGGTTTTTCAGT        | This paper | N/A |
| ChIP-qPCR primers:<br>MAPLC3C<br>F: TGA CTCAGCGTGAGTGTTAGG<br>R: AAGACACCACTGGACTTCCG    | This paper | N/A |
| ChIP-qPCR primers:<br>RRAD1<br>F: GAGAGAGAGAGCGAGGTTGC<br>R: AGAATTCAGTCTCACGGGGC        | This paper | N/A |



|                                                                                       |            |     |
|---------------------------------------------------------------------------------------|------------|-----|
| ChIP-qPCR primers:<br>SEMA3A<br>F: GCCAGGCACCGGATAATGAG<br>R: GATTAGAGACTGCCACCGGC    | This paper | N/A |
| ChIP-qPCR primers:<br>EPHA6<br>F: GCCACTTTCCAGCCTCATGT<br>R: AAACCTTGACCAGCAGAGCGA    | This paper | N/A |
| ChIP-qPCR primers:<br>SLC7A11<br>F: ATTCTCCACCTCCTCGTTCCA<br>R: GTGACAGGCAGGCGCTTAAA  | This paper | N/A |
| ChIP-qPCR primers:<br>RUNX2<br>F: ACCCCATTCCAAGCTGCAAA<br>R: TGCCGGAGTCTTTGGAACAC     | This paper | N/A |
| ChIP-qPCR primers:<br>TMEM132A<br>F: TCAGAAGCTTCCGTGAGGGAG<br>R: GTCCTGGAAGCAACAGAGGA | This paper | N/A |
| ChIP-qPCR primers:<br>TP53IN1<br>F: GCTGTCTTCGGAGATGCGT<br>R: GGAGTTTGGTCTCTGCCTCC    | This paper | N/A |
| ChIP-qPCR primers:<br>DUSP10<br>F: ATCACCGTCCCTAGTGGGAA<br>R: CGCGAATTTGGCTTAGCGT     | This paper | N/A |
| ChIP-qPCR primers:<br>CCDC57<br>F: CCCGCACCTCACCTAACG<br>R: GGACCCCGTTTCCTGTCCG       | This paper | N/A |
| ChIP-qPCR primers:<br>CNPY3<br>F: GAGGGAAGTGACGTTGAGG<br>R: CCTCAGCGACCTATGGCAAA      | This paper | N/A |
| ChIP-qPCR primers:<br>SH3KBP1<br>F: CAAGTGGGAGTGAATGGGGG<br>R: GTCCACTTCAGCCTTGAGGG   | This paper | N/A |
| ChIP-qPCR primers:<br>SPHK1<br>F: GCCTTCTAGCCAGACGCCTA<br>R: CCACGAGCTGGTTCCCG        | This paper | N/A |
| ChIP-qPCR primers:<br>ARHGAP4<br>F: ATCAGAGCCTGGGAACGAAC<br>R: TTGGCTTAAGACGTGGGCTT   | This paper | N/A |
